# Supplementary material for: Hierarchical TAF1-dependent co-translational assembly of the basal transcription factor TFIID
Source: PubMed Central journal article supplement — bioRxiv. 2023 Apr 5:2023.04.05.535704. Preprint. [Version 1] doi: 10.1101/2023.04.05.535704 (PMC10104070; doi:10.1101/2023.04.05.535704), 2023-04-05
Supplement: media-1.pdf [file media-1.pdf]

**Supplementary Table 1:** summary of TFIID co-translational assembly events. Colors correspond to subunits color-code used in this work (related to Figure 1).

| nascent protein                           | co-translational interaction partner      |
|-------------------------------------------|-------------------------------------------|
| TAF1 <span style="color:blue">◆</span>    | TAF2 <span style="color:cyan">◆</span>    |
| TAF1 <span style="color:blue">◆</span>    | TAF4 <span style="color:red">◆</span>     |
| TAF1 <span style="color:blue">◆</span>    | TAF5 <span style="color:orange">◆</span>  |
| TAF1 <span style="color:blue">◆</span>    | TAF6 <span style="color:blue">◆</span>    |
| TAF1 <span style="color:blue">◆</span>    | TAF7 <span style="color:green">◆</span>   |
| TAF1 <span style="color:blue">◆</span>    | TAF8 <span style="color:magenta">◆</span> |
| TAF1 <span style="color:blue">◆</span>    | TAF10 <span style="color:purple">◆</span> |
| TAF1 <span style="color:blue">◆</span>    | TAF12 <span style="color:orange">◆</span> |
| TAF1 <span style="color:blue">◆</span>    | TBP <span style="color:gray">◆</span>     |
| TAF2 <span style="color:cyan">◆</span>    | TAF8 <span style="color:magenta">◆</span> |
| TAF3 <span style="color:green">◆</span>   | TAF10 <span style="color:purple">◆</span> |
| TAF4 <span style="color:red">◆</span>     | TAF12 <span style="color:orange">◆</span> |
| TAF6 <span style="color:blue">◆</span>    | TAF9 <span style="color:gold">◆</span>    |
| TAF6 <span style="color:blue">◆</span>    | TAF5 <span style="color:orange">◆</span>  |
| TAF7 <span style="color:green">◆</span>   | TAF1 <span style="color:blue">◆</span>    |
| TAF8 <span style="color:magenta">◆</span> | TAF2 <span style="color:cyan">◆</span>    |
| TAF8 <span style="color:magenta">◆</span> | TAF10 <span style="color:purple">◆</span> |
| TAF9 <span style="color:gold">◆</span>    | TAF6 <span style="color:blue">◆</span>    |
| TAF11 <span style="color:gray">◆</span>   | TAF13 <span style="color:orange">◆</span> |
| TAF13 <span style="color:orange">◆</span> | TAF11 <span style="color:gray">◆</span>   |

**Supplementary Table 2: X-linking MS combined table (related to Figure 5)**

Summary of TAF1-centered crosslinking-MS metanalysis performed on seven distinct datasets from three different groups: Patel et al., 2018 (TFIID), Scheer et al., 2021 (TFIID), Chen et al., 2021 (TFIID incorporated in different preinitiation complexes: cPICscp, cPICpuma, mPICscp, hPICscp, p53hPICdm2). Only crosslinks found in more than one dataset were considered.

**TAF1 interprotein crosslinks**

| <b>Protein 1</b> | <b>Protein 2</b> | <b>Position 1</b> | <b>Position 2</b> | <b>Protein 1</b> | <b>Protein 2</b> | <b>Position 1</b> | <b>Position 2</b> |
|------------------|------------------|-------------------|-------------------|------------------|------------------|-------------------|-------------------|
| TAF1             | TAF11            | 249               | 95                | TAF1             | TAF6             | 378               | 357               |
| TAF1             | TAF11            | 249               | 97                | TAF1             | TAF6             | 424               | 342               |
| TAF1             | TAF11            | 249               | 105               | TAF1             | TAF6             | 427               | 342               |
| TAF1             | TAF11            | 249               | 197               | TAF1             | TAF6             | 427               | 287               |
| TAF1             | TAF11            | 249               | 197               | TAF1             | TAF7             | 622               | 5                 |
| TAF1             | TAF13            | 249               | 101               | TAF1             | TAF7             | 622               | 291               |
| TAF1             | TAF13            | 249               | 101               | TAF1             | TAF7             | 674               | 40                |
| TAF1             | TAF2             | 544               | 383               | TAF1             | TAF7             | 674               | 40                |
| TAF1             | TAF2             | 544               | 788               | TAF1             | TAF7             | 817               | 5                 |
| TAF1             | TAF2             | 562               | 788               | TAF1             | TAF7             | 819               | 5                 |
| TAF1             | TAF2             | 576               | 384               | TAF1             | TAF7             | 832               | 5                 |
| TAF1             | TAF2             | 576               | 565               | TAF1             | TAF7             | 889               | 164               |
| TAF1             | TAF2             | 701               | 513               | TAF1             | TAF7             | 906               | 164               |
| TAF1             | TAF2             | 710               | 595               | TAF1             | TAF7             | 906               | 167               |
| TAF1             | TAF2             | 945               | 513               | TAF1             | TAF7             | 1127              | 164               |
| TAF1             | TAF5             | 370               | 318               | TAF1             | TAF7             | 1187              | 164               |
| TAF1             | TAF6             | 330               | 65                | TAF1             | TAF7             | 1201              | 155               |
| TAF1             | TAF6             | 330               | 196               | TAF1             | TAF7             | 1201              | 153               |
| TAF1             | TAF6             | 330               | 158               | TAF1             | TAF7             | 1208              | 167               |
| TAF1             | TAF6             | 335               | 196               | TAF1             | TAF8             | 427               | 178               |
| TAF1             | TAF6             | 370               | 196               | TAF1             | TAF9             | 330               | 24                |
| TAF1             | TAF6             | 370               | 367               | TAF1             | TAF9             | 330               | 10                |
| TAF1             | TAF6             | 370               | 361               | TAF1             | TBP              | 168               | 243               |
| TAF1             | TAF6             | 378               | 361               | TAF1             | TBP              | 170               | 333               |
| TAF1             | TAF6             | 378               | 361               | TAF1             | TBP              | 1009              | 181               |
| TAF1             | TAF6             | 378               | 367               |                  |                  |                   |                   |

**TAF1 intraprotein crosslinks**

| <b>Protein 1</b> | <b>Protein 2</b> | <b>Position 1</b> | <b>Position 2</b> | <b>Protein 1</b> | <b>Protein 2</b> | <b>Position 1</b> | <b>Position 2</b> |
|------------------|------------------|-------------------|-------------------|------------------|------------------|-------------------|-------------------|
| TAF1             | TAF1             | 330               | 370               | TAF1             | TAF1             | 1009              | 1046              |
| TAF1             | TAF1             | 335               | 370               | TAF1             | TAF1             | 1009              | 1127              |
| TAF1             | TAF1             | 367               | 370               | TAF1             | TAF1             | 1009              | 1111              |
| TAF1             | TAF1             | 527               | 531               | TAF1             | TAF1             | 1046              | 1063              |
| TAF1             | TAF1             | 531               | 536               | TAF1             | TAF1             | 1046              | 1201              |
| TAF1             | TAF1             | 531               | 1436              | TAF1             | TAF1             | 1111              | 1127              |
| TAF1             | TAF1             | 531               | 976               | TAF1             | TAF1             | 1111              | 1201              |
| TAF1             | TAF1             | 531               | 544               | TAF1             | TAF1             | 1111              | 1187              |
| TAF1             | TAF1             | 536               | 544               | TAF1             | TAF1             | 1112              | 1187              |
| TAF1             | TAF1             | 536               | 549               | TAF1             | TAF1             | 1112              | 1201              |
| TAF1             | TAF1             | 536               | 576               | TAF1             | TAF1             | 1112              | 1127              |
| TAF1             | TAF1             | 544               | 943               | TAF1             | TAF1             | 1112              | 1177              |

|      |      |     |      |      |      |      |      |
|------|------|-----|------|------|------|------|------|
| TAF1 | TAF1 | 544 | 1063 | TAF1 | TAF1 | 1112 | 1208 |
| TAF1 | TAF1 | 544 | 1009 | TAF1 | TAF1 | 1117 | 1127 |
| TAF1 | TAF1 | 544 | 576  | TAF1 | TAF1 | 1127 | 1208 |
| TAF1 | TAF1 | 544 | 549  | TAF1 | TAF1 | 1127 | 1187 |
| TAF1 | TAF1 | 544 | 710  | TAF1 | TAF1 | 1127 | 1166 |
| TAF1 | TAF1 | 549 | 706  | TAF1 | TAF1 | 1127 | 1201 |
| TAF1 | TAF1 | 549 | 707  | TAF1 | TAF1 | 1166 | 1187 |
| TAF1 | TAF1 | 549 | 1063 | TAF1 | TAF1 | 1187 | 1208 |
| TAF1 | TAF1 | 549 | 705  | TAF1 | TAF1 | 1201 | 1208 |
| TAF1 | TAF1 | 576 | 701  | TAF1 | TAF1 | 1201 | 1222 |
| TAF1 | TAF1 | 576 | 1063 | TAF1 | TAF1 | 1240 | 1255 |
| TAF1 | TAF1 | 576 | 943  | TAF1 | TAF1 | 1240 | 1244 |
| TAF1 | TAF1 | 576 | 945  | TAF1 | TAF1 | 1249 | 1255 |
| TAF1 | TAF1 | 611 | 832  | TAF1 | TAF1 | 1249 | 1261 |
| TAF1 | TAF1 | 611 | 621  | TAF1 | TAF1 | 1261 | 1581 |
| TAF1 | TAF1 | 611 | 622  | TAF1 | TAF1 | 1305 | 1322 |
| TAF1 | TAF1 | 611 | 976  | TAF1 | TAF1 | 1305 | 1327 |
| TAF1 | TAF1 | 621 | 832  | TAF1 | TAF1 | 1317 | 1339 |
| TAF1 | TAF1 | 622 | 1111 | TAF1 | TAF1 | 1317 | 1327 |
| TAF1 | TAF1 | 641 | 674  | TAF1 | TAF1 | 1322 | 1327 |
| TAF1 | TAF1 | 701 | 710  | TAF1 | TAF1 | 1322 | 1344 |
| TAF1 | TAF1 | 701 | 707  | TAF1 | TAF1 | 1322 | 1339 |
| TAF1 | TAF1 | 705 | 1063 | TAF1 | TAF1 | 1327 | 1344 |
| TAF1 | TAF1 | 705 | 710  | TAF1 | TAF1 | 1327 | 1535 |
| TAF1 | TAF1 | 705 | 707  | TAF1 | TAF1 | 1327 | 1487 |
| TAF1 | TAF1 | 817 | 832  | TAF1 | TAF1 | 1327 | 1329 |
| TAF1 | TAF1 | 817 | 1004 | TAF1 | TAF1 | 1339 | 1581 |
| TAF1 | TAF1 | 819 | 832  | TAF1 | TAF1 | 1339 | 1347 |
| TAF1 | TAF1 | 819 | 1004 | TAF1 | TAF1 | 1344 | 1487 |
| TAF1 | TAF1 | 831 | 1205 | TAF1 | TAF1 | 1344 | 1354 |
| TAF1 | TAF1 | 899 | 1208 | TAF1 | TAF1 | 1344 | 1399 |
| TAF1 | TAF1 | 899 | 1187 | TAF1 | TAF1 | 1353 | 1399 |
| TAF1 | TAF1 | 899 | 1201 | TAF1 | TAF1 | 1372 | 1487 |
| TAF1 | TAF1 | 906 | 1208 | TAF1 | TAF1 | 1372 | 1555 |
| TAF1 | TAF1 | 906 | 1201 | TAF1 | TAF1 | 1412 | 1419 |
| TAF1 | TAF1 | 906 | 1187 | TAF1 | TAF1 | 1412 | 1535 |
| TAF1 | TAF1 | 922 | 1009 | TAF1 | TAF1 | 1412 | 1542 |
| TAF1 | TAF1 | 922 | 1201 | TAF1 | TAF1 | 1414 | 1419 |
| TAF1 | TAF1 | 943 | 971  | TAF1 | TAF1 | 1415 | 1535 |
| TAF1 | TAF1 | 943 | 967  | TAF1 | TAF1 | 1415 | 1542 |
| TAF1 | TAF1 | 945 | 976  | TAF1 | TAF1 | 1419 | 1534 |
| TAF1 | TAF1 | 967 | 976  | TAF1 | TAF1 | 1419 | 1542 |
| TAF1 | TAF1 | 971 | 979  | TAF1 | TAF1 | 1419 | 1535 |
| TAF1 | TAF1 | 971 | 986  | TAF1 | TAF1 | 1454 | 1534 |
| TAF1 | TAF1 | 976 | 979  | TAF1 | TAF1 | 1454 | 1535 |
| TAF1 | TAF1 | 976 | 986  | TAF1 | TAF1 | 1463 | 1535 |
| TAF1 | TAF1 | 979 | 987  | TAF1 | TAF1 | 1463 | 1534 |

|      |      |      |      |      |      |      |      |
|------|------|------|------|------|------|------|------|
| TAF1 | TAF1 | 979  | 986  | TAF1 | TAF1 | 1480 | 1493 |
| TAF1 | TAF1 | 986  | 1009 | TAF1 | TAF1 | 1480 | 1487 |
| TAF1 | TAF1 | 986  | 1046 | TAF1 | TAF1 | 1482 | 1487 |
| TAF1 | TAF1 | 986  | 1127 | TAF1 | TAF1 | 1482 | 1493 |
| TAF1 | TAF1 | 986  | 1001 | TAF1 | TAF1 | 1487 | 1493 |
| TAF1 | TAF1 | 1001 | 1009 | TAF1 | TAF1 | 1493 | 1559 |
| TAF1 | TAF1 | 1001 | 1018 | TAF1 | TAF1 | 1534 | 1542 |
| TAF1 | TAF1 | 1004 | 1018 | TAF1 | TAF1 | 1542 | 1581 |
| TAF1 | TAF1 | 1009 | 1063 | TAF1 | TAF1 | 1561 | 1622 |
| TAF1 | TAF1 | 1009 | 1006 |      |      |      |      |

**Supplementary Table 3: oligonucleotide sequences and antibodies**

| <b>RT-qPCR primers</b>                                   |                                                             |
|----------------------------------------------------------|-------------------------------------------------------------|
| GAPDH Fwd                                                | TCGACAGTCAGCCGCATCTTCTTT                                    |
| GAPDH Rev                                                | ACCAAATCCGTTGACTCCGACCTT                                    |
| PPIB Fwd                                                 | CCGAACGCAACATGAAGGTG                                        |
| PPIB Rev                                                 | ACCAAAGATCACCCGGCCTA                                        |
| TAF1 Fwd                                                 | TTCCAACCCTGTTGCCATGA                                        |
| TAF1 Rev                                                 | TTTCTGCGAACCTCATCCGC                                        |
| TAF2 Fwd                                                 | CATGTGTACCGCCAAAGT                                          |
| TAF2 Rev                                                 | GCAGTTGCTTCTGTGTAAATC                                       |
| TAF3 Fwd                                                 | GACGACTGCGATGACTGGTA                                        |
| TAF3 Rev                                                 | CTTCTTGTTTCGCACACTTGG                                       |
| TAF4 Fwd                                                 | GCCGCGCAAACCTTGAATG                                         |
| TAF4 Rev                                                 | TTGTTGACCAGGCTGACAGC                                        |
| TAF5 Fwd                                                 | AGTTGGAAGTGTGCTGTGG                                         |
| TAF5 Rev                                                 | TCCTTGTTGGTTGTAGGCTGAC                                      |
| TAF6 Fwd                                                 | CCAGGAGTTCATTCCTTTC                                         |
| TAF6 Rev                                                 | TGATGTCGCTCAGATCAACC                                        |
| TAF7 Fwd                                                 | TCTACTGTGAGAAGGGCAGTAC                                      |
| TAF7 Rev                                                 | ATTCCATGACGCCCATCAGG                                        |
| TAF8 Fwd                                                 | ACAGAGGCAGGGTTTGAGAGT                                       |
| TAF8 Rev                                                 | AGACTTGGCACTTCTCCCAAT                                       |
| TAF9 Fwd                                                 | GGAGTTTGCCTTCCGATATG                                        |
| TAF9 Rev                                                 | CGCACATCATCTGCATCAAC                                        |
| TAF9/9B Fwd                                              | ATCAAACCCCTTTGCCA                                           |
| TAF9/9B Rev                                              | TTCAGCCTATAGTTTGGAGC                                        |
| TAF10 Fwd                                                | TGCCAATGATGCCCTACAGC                                        |
| TAF10 Rev                                                | AGGGCAGGGGTCAAGTCCTC                                        |
| TAF11 Fwd                                                | AAAGGCTGATCCAGTCCATCAC                                      |
| TAF11 Rev                                                | TTTCTCCCCACTTCTCACACAC                                      |
| TAF12 Fwd                                                | TATGAGGACCCGCACTCCTAC                                       |
| TAF12 Rev                                                | GCCGAGCTTTGGACTTCAGC                                        |
| TAF13 Fwd                                                | AATTGGAGGAGGTGCAGAAGG                                       |
| TAF13 Rev                                                | TGGTCATCCCCAAAGCCATAC                                       |
| TBP Fwd                                                  | TCATACCGTGCTGCTATCT                                         |
| TBP Rev                                                  | CTCCCTCAAACCAACTTGTC                                        |
| Rplp0-mouse Fwd                                          | TTCTGAGTGATGTGCAGCTG                                        |
| Rplp0-mouse Rev                                          | GGAGATGTTTCAGCATGTTTCAGC                                    |
| Taf1-mouse Fwd                                           | TGGAGATGGTGATCTTGCAG                                        |
| Taf1-mouse Rev                                           | TCCTCATCATCTTCGCCTTC                                        |
| Taf8-mouse Fwd                                           | ATATCAGCACGGACGATTCC                                        |
| Taf8-mouse Rev                                           | GGTTATCGATGACGCTCTCC                                        |
| Taf10-mouse Fwd                                          | CCACGCATAATTCCGGCTCAT                                       |
| Taf10-mouse Rev                                          | CCTCCATGGTTAGGTGTA                                          |
| <b>smiFISH primary probes (including FLAP extension)</b> |                                                             |
| CTNNB1_01                                                | CTCATGTTCCATCATGGGGTCCATACCTTACACTCGGACCTCGTCGACATGCATT     |
| CTNNB1_02                                                | GCATCCTGGCCATATCCACCAGAGTGTTACACTCGGACCTCGTCGACATGCATT      |
| CTNNB1_03                                                | TGTTCTGAAGAGAGAGCTGGTCAGCTCAACTTTACACTCGGACCTCGTCGACATGCATT |
| CTNNB1_04                                                | GCCGTTTCTTGTAATCTTGTGGCTTGTCTTTACACTCGGACCTCGTCGACATGCATT   |
| CTNNB1_05                                                | AGCTGTGGCTCCCTCAGCTTCAATAGTTACACTCGGACCTCGTCGACATGCATT      |

|           |                                                               |
|-----------|---------------------------------------------------------------|
| CTNNB1_06 | TGCAGCTTCCTTGTCTGAGCAAGTTCATTACACTCGGACCTCGTCGACATGCATT       |
| CTNNB1_07 | GAGCTAGGATGTGAAGGGCTCCGGTACAACCTTACACTCGGACCTCGTCGACATGCATT   |
| CTNNB1_08 | AAATTGCTGCTGTGTCCCACCCATGGTTACACTCGGACCTCGTCGACATGCATT        |
| CTNNB1_09 | GGCCAGTGGGATGGTGGGTGTAAGAGCTTACACTCGGACCTCGTCGACATGCATT       |
| CTNNB1_10 | TGGGCCATCTCTGCTTCTTGGTGTCTTACACTCGGACCTCGTCGACATGCATT         |
| CTNNB1_11 | TGATGTCTTCCCTGTACCAGCCGATTACACTCGGACCTCGTCGACATGCATT          |
| CTNNB1_12 | GTCCCAAGGAGACCTTCCATCCCTTCTTACACTCGGACCTCGTCGACATGCATT        |
| CTNNB1_13 | AGCACCTTCAGCACTCTGCTTGTGGTTTACACTCGGACCTCGTCGACATGCATT        |
| CTNNB1_14 | ACCACTAGCCAGTATGATGAGCTTGGCTTTTACACTCGGACCTCGTCGACATGCATT     |
| CTNNB1_15 | TTGTTTTGTTGAGCAAGGCAACCATTTTCTGCTTACACTCGGACCTCGTCGACATGCATT  |
| CTNNB1_16 | TGGGAAAGGTTATGCAAGGTCCCAGCGGTATTACACTCGGACCTCGTCGACATGCATT    |
| CTNNB1_17 | ATAGCGTGTCTGGAAGCTTCCTTTTTAGAAAGTTACACTCGGACCTCGTCGACATGCATT  |
| CTNNB1_18 | TGGTCCTCGTCATTTAGCAGTTTTGTGAGTTCTTACACTCGGACCTCGTCGACATGCATT  |
| CTNNB1_19 | ATTGCACGTGTGGCAAGTCTGCATCATCTTACACTCGGACCTCGTCGACATGCATT      |
| CTNNB1_20 | ATGGTTCAGCCAAACGCTGGACATTAGTGGTTACACTCGGACCTCGTCGACATGCATT    |
| CTNNB1_21 | GTCCATCAATATCAGCTACTTGTCTTGTAGTGTACACTCGGACCTCGTCGACATGCATT   |
| CTNNB1_22 | CTTGGGAGGTATCCACATCCTCTTCCCTTACACTCGGACCTCGTCGACATGCATT       |
| CTNNB1_23 | ATTGCCTTTACCACTCAGAGAAGGAGCTGTTTACACTCGGACCTCGTCGACATGCATT    |
| CTNNB1_24 | GTGGCACCAGAATGGATTCCAGAGTCCAGTTACACTCGGACCTCGTCGACATGCATT     |
| TAF1_01   | GCAATGGAGTGGAAATCCTCACTGTCTTTACACTCGGACCTCGTCGACATGCATT       |
| TAF1_02   | CTCATAGCTCCCATAACTGATGTTGCTATTTACACTCGGACCTCGTCGACATGCATT     |
| TAF1_03   | TCCACTTTCCTCAGCTGGATAGCAGAGTTACACTCGGACCTCGTCGACATGCATT       |
| TAF1_04   | GGAGATGTTCTTACGTATGGTCTCTAAATCCATTACACTCGGACCTCGTCGACATGCATT  |
| TAF1_05   | AGCAAGGGGTTGATAGCTTCTCTAAGCGAGTTACACTCGGACCTCGTCGACATGCATT    |
| TAF1_06   | AGTCCTTTACAACCTTTGCATTGACTGGAGTTTACACTCGGACCTCGTCGACATGCATT   |
| TAF1_07   | AAGGTGGCGCATTTGTTTGATAATAGAGGGGGTTACACTCGGACCTCGTCGACATGCATT  |
| TAF1_08   | GAATTTGTTAGTCCTCATGTGTCCAATGGCATTACACTCGGACCTCGTCGACATGCATT   |
| TAF1_09   | ACATAGGCATCAATGACAGCTGGTTTTTCGGTTACACTCGGACCTCGTCGACATGCATT   |
| TAF1_10   | AGACTTCAGTTGATGACAGAACCTTGTCTGTTTACACTCGGACCTCGTCGACATGCATT   |
| TAF1_11   | GTCAAAGATGCGCTGACATTCCTCTTTGTAATTACACTCGGACCTCGTCGACATGCATT   |
| TAF1_12   | AACTTTTTAATCTCTTCCCTCAGGCACACCTTACACTCGGACCTCGTCGACATGCATT    |
| TAF1_13   | AGAAGTTGCTTGGCATTTTTTCAGGGAAAGGCGTTACACTCGGACCTCGTCGACATGCATT |
| TAF1_14   | AGCAATGAAGGCCCTTGTGGTGTTCGAAGTTACACTCGGACCTCGTCGACATGCATT     |
| TAF1_15   | GCAGTGCGAACTTCATCATCAATCTTCATTTACACTCGGACCTCGTCGACATGCATT     |
| TAF1_16   | AATTCCCGAATATAGTAACCCTGTCTTGTCTTACACTCGGACCTCGTCGACATGCATT    |
| TAF1_17   | ATGTGGGTGGGAAAGAAGGGCTGCCGTAATTTACACTCGGACCTCGTCGACATGCATT    |
| TAF1_18   | GGCATGGCCTGAGCATCCCAAATGATTTACACTCGGACCTCGTCGACATGCATT        |
| TAF1_19   | CCAGCGTCCATATAACCAGATCCTCATTTACACTCGGACCTCGTCGACATGCATT       |
| TAF1_20   | GATGATATCATCTCCCAATGCAGCTTTACACTCGGACCTCGTCGACATGCATT         |
| TAF1_21   | TCGTGATTTTCATCATCAGAGAGACACTGCTTTACACTCGGACCTCGTCGACATGCATT   |
| TAF1_22   | CAAAGACTTCTGGCTGACTTCTGATTCTACTTACACTCGGACCTCGTCGACATGCATT    |
| TAF1_23   | CAATGGAAGGGTCAGCTTTCCATCTTCCAGATTACACTCGGACCTCGTCGACATGCATT   |

| TAF1_24                             | TTCATCATTTACCAAGGCACCGTCAGTCCCTTACACTCGGACCTCGTCGACATGCATT |                                    |             |
|-------------------------------------|------------------------------------------------------------|------------------------------------|-------------|
| <b>smiFISH secondary FLAP probe</b> |                                                            |                                    |             |
| 2×Cy3-FLAP                          | AATGCATGTGCGACGAGGTCCGAGTGTA                               |                                    |             |
| <b>Antibodies</b>                   |                                                            |                                    |             |
| Target                              | Clonality                                                  | Reference/Clone                    | Application |
| GST                                 | mouse mAb                                                  | 15TF2 1D10 (Creative Biolabs)      | IP          |
| TAF1                                | rabbit pAb                                                 | ab188427 (Abcam)                   | IF          |
| TAF1                                | rabbit pAb                                                 | ab264327 (Abcam)                   | IP, WB      |
| TAF2                                | rabbit pAb                                                 | #3038 (Trowitzsch et al., 2015)    | IP          |
| TAF4                                | mouse mAb                                                  | 32TA 2B9 (Mohan et al., 2003)      | IP, IF, WB  |
| TAF5                                | mouse mAb                                                  | 1TA 1C2 (Dantonel et al., 1997)    | WB          |
| TAF6                                | mouse mAb                                                  | 25TA 2G7 (Dantonel et al., 1997)   | WB          |
| TAF6                                | rabbit pAb                                                 | A301-275A (Bethyl)                 | RIP         |
| TAF7                                | rabbit pAb                                                 | #3475 (Bardot et al., 2017)        | IP, IF      |
| TAF7                                | mouse mAb                                                  | 31TA 2C12 (present work)           | RIP         |
| TAF7                                | mouse mAb                                                  | 19TA 2C7 (Lavigne et al., 1996)    | WB          |
| TAF8                                | rabbit pAb                                                 | #3478 (Bardot et al., 2017)        | WB          |
| TAF9                                | goat pAb                                                   | sc-1248 (Santa Cruz Biotechnology) | WB          |
| TAF10                               | mouse mAb                                                  | 23TA 1H8 (Soutoglou et al., 2005)  | IP, RIP     |
| TAF10                               | mouse mAb                                                  | 6TA 2B11 (Wieczorek et al., 1998)  | RIP, IF, WB |
| TAF11                               | mouse mAb                                                  | 15TA 2B4 (Gupta et al., 2017)      | IP          |
| TAF12                               | mouse mAb                                                  | 22TA 2A1 (Brand et al., 2001)      | WB          |
| TAF13                               | mouse mAb                                                  | 16TA 3C12 (Mengus et al., 1995)    | WB          |
| TBP                                 | mouse mAb                                                  | 3TF1 3G3 (Brou et al., 1993)       | WB, IF      |
| SUPT7L                              | rabbit pAb                                                 | A302-803A (Bethyl)                 | IF          |
| lamin A/C                           | mouse mAb                                                  | sc-7292 (Santa Cruz Biotechnology) | WB          |
| GAPDH                               | rabbit mAb                                                 | 14C10 (Cell Signaling Technology)  | WB          |
| histone H3                          | rabbit pAb                                                 | ab1791 (Abcam)                     | WB          |

## Supplementary References

- Bardot, P., Vincent, S.D., Fournier, M., Hubaud, A., Joint, M., Tora, L., Pourquié, O., 2017. The TAF10-containing TFIID and SAGA transcriptional complexes are dispensable for early somitogenesis in the mouse embryo. *Development* 144, 3808–3818. <https://doi.org/10.1242/dev.146902>
- Brand, M., Moggs, J.G., Oulad-Abdelghani, M., Lejeune, F., Dilworth, F.J., Stevenin, J., Almouzni, G., Tora, L., 2001. UV-damaged DNA-binding protein in the TFII complex links DNA damage recognition to nucleosome acetylation. *EMBO J* 20, 3187–3196. <https://doi.org/10.1093/emboj/20.12.3187>
- Brou, C., Chaudhary, S., Davidson, I., Lutz, Y., Wu, J., Egly, J.M., Tora, L., Chambon, P., 1993. Distinct TFIID complexes mediate the effect of different transcriptional activators. *EMBO J* 12, 489–499. <https://doi.org/10.1002/j.1460-2075.1993.tb05681.x>
- Dantonel, J.C., Murthy, K.G., Manley, J.L., Tora, L., 1997. Transcription factor TFIID recruits factor CPSF for formation of 3' end of mRNA. *Nature* 389, 399–402. <https://doi.org/10.1038/38763>
- Gupta, K., Watson, A.A., Baptista, T., Scheer, E., Chambers, A.L., Koehler, C., Zou, J., Obong-Ebong, I., Kandiah, E., Temblador, A., Round, A., Forest, E., Man, P., Bieniossek, C., Laue, E.D., Lemke, E.A., Rappsilber, J., Robinson, C.V., Devys, D., Tora, L., Berger, I., 2017. Architecture of TAF11/TAF13/TBP complex suggests novel regulation properties of general transcription factor TFIID. *Elife* 6, e30395. <https://doi.org/10.7554/eLife.30395>
- Lavigne, A.C., Mengus, G., May, M., Dubrovskaya, V., Tora, L., Chambon, P., Davidson, I., 1996. Multiple interactions between hTAFII55 and other TFIID subunits. Requirements for the formation of stable ternary complexes between hTAFII55 and the TATA-binding protein. *J Biol Chem* 271, 19774–19780. <https://doi.org/10.1074/jbc.271.33.19774>
- Mengus, G., May, M., Jacq, X., Staub, A., Tora, L., Chambon, P., Davidson, I., 1995. Cloning and characterization of hTAFII18, hTAFII20 and hTAFII28: three subunits of the human transcription factor TFIID. *EMBO J* 14, 1520–1531.

- Mohan, W.S., Scheer, E., Wendling, O., Metzger, D., Tora, L., 2003. TAF10 (TAFII30) Is Necessary for TFIID Stability and Early Embryogenesis in Mice. *Molecular and Cellular Biology* 23, 4307–4318. <https://doi.org/10.1128/MCB.23.12.4307-4318.2003>
- Soutoglou, E., Demény, M.A., Scheer, E., Fienga, G., Sassone-Corsi, P., Tora, L., 2005. The Nuclear Import of TAF10 Is Regulated by One of Its Three Histone Fold Domain-Containing Interaction Partners. *Molecular and Cellular Biology* 25, 4092–4104. <https://doi.org/10.1128/MCB.25.10.4092-4104.2005>
- Trowitzsch, S., Viola, C., Scheer, E., Conic, S., Chavant, V., Fournier, M., Papai, G., Ebong, I.-O., Schaffitzel, C., Zou, J., Haffke, M., Rappsilber, J., Robinson, C.V., Schultz, P., Tora, L., Berger, I., 2015. Cytoplasmic TAF2–TAF8–TAF10 complex provides evidence for nuclear holo–TFIID assembly from preformed submodules. *Nat Commun* 6, 6011. <https://doi.org/10.1038/ncomms7011>
- Wieczorek, E., Brand, M., Jacq, X., Tora, L., 1998. Function of TAF(II)-containing complex without TBP in transcription by RNA polymerase II. *Nature* 393, 187–191. <https://doi.org/10.1038/30283>
